# Supplementary material for: Predictors of early morbidity and mortality in newly diagnosed multiple myeloma: data from five randomized, controlled, phase III trials in 3700 patients
Source: Springer Nature journal article supplement (doi:10.1038/s41375-023-02105-6), 2023-12-07

## **SUPPLEMENTARY INFORMATION**

**Predictors of early morbidity and mortality in newly diagnosed multiple myeloma:  
data from five randomized, controlled, phase III trials in 3700 patients**

by E. K. Mai, et al.

## SUPPLEMENTARY TABLES

**Table S1.** Characteristics and treatments in the trials included in the multi-cohort analysis.

|                           | <b>GMMG-HD4/HOVON-65</b>                                                                                                                                                                                             | <b>GMMG-MM5</b>                                                                                                                                                                                                                                                                                                                                                                                                                                                       | <b>GMMG-HD6</b>                                                                                                                                                                                                                                                                                                                                                                                                                                                                                                                                        | <b>EMN02/HOVON-95</b>                                                                                                                                                                                                           | <b>GMMG-HD7</b>                                                                                                                                                                                                                                                                                                                                                                                                                                                                                                                                                                                                                             |
|---------------------------|----------------------------------------------------------------------------------------------------------------------------------------------------------------------------------------------------------------------|-----------------------------------------------------------------------------------------------------------------------------------------------------------------------------------------------------------------------------------------------------------------------------------------------------------------------------------------------------------------------------------------------------------------------------------------------------------------------|--------------------------------------------------------------------------------------------------------------------------------------------------------------------------------------------------------------------------------------------------------------------------------------------------------------------------------------------------------------------------------------------------------------------------------------------------------------------------------------------------------------------------------------------------------|---------------------------------------------------------------------------------------------------------------------------------------------------------------------------------------------------------------------------------|---------------------------------------------------------------------------------------------------------------------------------------------------------------------------------------------------------------------------------------------------------------------------------------------------------------------------------------------------------------------------------------------------------------------------------------------------------------------------------------------------------------------------------------------------------------------------------------------------------------------------------------------|
| <b>Recruitment period</b> | 05/2005–05/2008                                                                                                                                                                                                      | 07/2010–11/2013                                                                                                                                                                                                                                                                                                                                                                                                                                                       | 06/2015–09/2017                                                                                                                                                                                                                                                                                                                                                                                                                                                                                                                                        | 02/2011–04/2014                                                                                                                                                                                                                 | 10/2018–09/2020                                                                                                                                                                                                                                                                                                                                                                                                                                                                                                                                                                                                                             |
| <b>Induction regimen</b>  | <p><b>Arm B: PAD</b><br/>bortezomib i.v. 1.3 mg/m<sup>2</sup> on days 1, 4, 8, 11 / doxorubicin i.v. 9 mg/m<sup>2</sup> on days 1–4 / dexamethasone p.o. 40 mg on days 1–4, 9–12, 17–20; repeated on day 29 (3x)</p> | <p><b>Arms A1+B1: PAD</b><br/>bortezomib i.v./s.c. 1.3 mg/m<sup>2</sup> on days 1, 4, 8, 11 / doxorubicin i.v. 9 mg/m<sup>2</sup> on days 1–4 / dexamethasone p.o. 20 mg on days 1–4, 9–12, 17–20; repeated on day 29 (3x)</p> <p><b>Arms A2+B2: VCD</b><br/>bortezomib i.v./s.c. 1.3 mg/m<sup>2</sup> on days 1, 4, 8, 11 / cyclophosphamide i.v. 900 mg/m<sup>2</sup> on day 1 / dexamethasone p.o. 40 mg on days 1–2, 4–5, 8–9, 11–12, repeated on day 22 (3x)</p> | <p><b>Arms A1+A2: RVd</b><br/>lenalidomide p.o. 25 mg on days 1–14 / bortezomib s.c. 1.3 mg/m<sup>2</sup> on days 1, 4, 8, 11 / dexamethasone 20 mg on days 1–2, 4–5, 8–9, 11–12; repeat on day 22 (4x)</p> <p><b>Arms B1+B2: Elotuzumab-RVd</b><br/>elotuzumab i.v. 10 mg/kg on days 1, 8, 15 (cycles 1+2) and on days 1 and 11 (cycles 3+4) / lenalidomide p.o. 25 mg on days 1–14 / bortezomib s.c. 1.3 mg/m<sup>2</sup> on days 1, 4, 8, 11 / dexamethasone 20 mg on days 1–2, 4–5, 8–9, 11–12 and 15 (only cycles 1+2); repeat on day 22 (4x)</p> | <p><b>VCD:</b> bortezomib i.v. 1.3 mg/m<sup>2</sup> on days 1, 4, 8, 11 / cyclophosphamide i.v. 500 mg/m<sup>2</sup> on days 1 and 8 / dexamethasone p.o. 40 mg on days 1–2, 4–5, 8–9, 11–12; repeated on day 22 (3x or 4x)</p> | <p><b>Arm IA: RVd</b> lenalidomide p.o. 25 mg on days 1–14 and 22–35 / bortezomib s.c. 1.3 mg/m<sup>2</sup> on days 1, 4, 8, 11, 22, 25, 29, 32 / dexamethasone 20 mg on days 1–2, 4–5, 8–9, 11–12, 15, 22–23, 25–26, 29–30, 32–33; repeat on day 43 (3x)</p> <p><b>Arm IB: Isatuximab-RVd</b><br/>isatuximab i.v. 10 mg/kg on days 1, 8, 15, 22, 29 (cycle 1) and on days 1, 15, 29 (cycles 2+3) / lenalidomide p.o. 25 mg on days 1–14 and 22–35 / bortezomib s.c. 1.3 mg/m<sup>2</sup> on days 1, 4, 8, 11, 22, 25, 29, 32 / dexamethasone 20 mg on days 1–2, 4–5, 8–9, 11–12, 15, 22–23, 25–26, 29–30, 32–33; repeat on day 43 (3x)</p> |

|                                               |                               |                               |                                     |                 |                                     |
|-----------------------------------------------|-------------------------------|-------------------------------|-------------------------------------|-----------------|-------------------------------------|
| <b>Anti-bacterial prophylaxis<sup>a</sup></b> | Recommended                   | Mandatory                     | Mandatory                           | Recommended     | Recommended                         |
| <b>N of patients per induction treatment</b>  | 192/218 (PAD only)            | 596 (PAd: 296; VCD: 300)      | 545 (RVd: 272; elotuzumab-RVd: 273) | 1491 (VCD only) | 658 (RVd: 328; isatuximab-RVd: 330) |
| <b>CTCAE version</b>                          | 3.0                           | 4.0                           | 5.0                                 | 4.0             | 5.0                                 |
| <b>Trial registry</b>                         | EudraCT No.<br>2004-000944-26 | EudraCT No.<br>2010-019173-16 | NCT<br>02495922                     | NCT<br>01208766 | NCT<br>03617731                     |

CTCAE National Cancer Institute Common Terminology Criteria for Adverse Events, *EMN* European Myeloma Network, *GMMG* German-speaking Myeloma Multicenter Group, *HOVON* Dutch–Belgian Cooperative Trial Group for Hematology Oncology Foundation.

<sup>a</sup>Recommendations according to study protocols – HD4/HO-65: cotrimoxazol; MM5: cotrimoxazol or ciprofloxacin; HD6: cotrimoxazol or ciprofloxacin; EMN02/HO-95: not specified/according to local protocols; HD7: cotrimoxazol.

**Table S2.** Patient demographics and baseline characteristics in the trials included in the training cohort.

| <i>n</i> (%)                  |                        | <b>GMMG-HD4</b> | <b>GMMG-MM5</b> | <b>GMMG-HD6</b> | <b>All</b>  |
|-------------------------------|------------------------|-----------------|-----------------|-----------------|-------------|
| <b>Evaluable</b>              | Yes                    | 192 (100)       | 596 (100)       | 545 (100)       | 1333 (100)  |
| <b>Completed IT</b>           | Yes                    | 180 (93.8)      | 567 (95.1)      | 514 (94.3)      | 1261 (94.6) |
| <b>Median age</b>             | Years (range)          | 55 (31–65)      | 58 (32–70)      | 58 (32–70)      | 58 (31–70)  |
| <b>Age &gt; 60 years</b>      | No                     | 140 (72.9)      | 347 (58.2)      | 312 (57.2)      | 799 (59.9)  |
|                               | Yes                    | 52 (27.1)       | 249 (41.8)      | 233 (42.8)      | 534 (40.1)  |
|                               | Missing                | -               | -               | -               | -           |
| <b>Sex</b>                    | Female                 | 121 (63.0)      | 348 (58.4)      | 309 (56.7)      | 778 (58.4)  |
|                               | Male                   | 71 (37.0)       | 248 (41.6)      | 236 (43.3)      | 555 (41.6)  |
|                               | Missing                | -               | -               | -               | -           |
| <b>WHO performance status</b> | 0–1                    | 177 (92.2)      | 533 (90.5)      | 496 (91.0)      | 1206 (91.0) |
|                               | > 1                    | 15 (7.8)        | 56 (9.5)        | 49 (9.0)        | 120 (9.0)   |
|                               | Missing                | -               | 7               | -               | 7           |
| <b>Body mass index</b>        | ≤ 30 kg/m <sup>2</sup> | 162 (84.4)      | 488 (81.9)      | 438 (81.0)      | 1088 (81.9) |
|                               | > 30 kg/m <sup>2</sup> | 30 (15.6)       | 108 (18.1)      | 103 (19.0)      | 241 (18.1)  |
|                               | Missing                | -               | -               | 4               | 4           |
| <b>White blood cell count</b> | ≥ 4.0/nL               | 169 (88.0)      | 487 (81.7)      | 436 (80.0)      | 1092 (81.9) |
|                               | < 4.0/nL               | 23 (12.0)       | 109 (18.3)      | 109 (20.0)      | 241 (18.1)  |
|                               | Missing                | -               | -               | -               | -           |
| <b>Hemoglobin</b>             | ≥ 10.0 g/dL            | 121 (63.0)      | 394 (66.1)      | 385 (70.6)      | 900 (67.5)  |
|                               | < 10.0 g/dL            | 71 (37.0)       | 202 (33.9)      | 160 (29.4)      | 433 (32.5)  |
|                               | Missing                | -               | -               | -               | -           |
| <b>Platelets</b>              | ≥ 150/nL               | 172 (89.6)      | 520 (87.2)      | 489 (89.7)      | 1181 (88.6) |
|                               | < 150/nL               | 20 (10.4)       | 76 (12.8)       | 56 (10.3)       | 152 (11.4)  |
|                               | Missing                | -               | -               | -               | -           |
| <b>Creatinine</b>             | ≤ 2.0 mg/dL            | 173 (90.1)      | 530 (88.9)      | 512 (93.9)      | 1215 (91.2) |
|                               | > 2.0 mg/dL            | 19 (9.9)        | 66 (11.1)       | 33 (6.1)        | 118 (8.8)   |
|                               | Missing                | -               | -               | -               | -           |
| <b>Calcium</b>                | ≤ 2.75 mmol/L          | 176 (92.6)      | 554 (93.0)      | 525 (96.3)      | 1255 (94.3) |
|                               | > 2.75 mmol/L          | 14 (7.4)        | 42 (7.0)        | 20 (3.7)        | 76 (5.7)    |
|                               | Missing                | 2               | -               | -               | 2           |
| <b>C-reactive protein</b>     | ≤ 5.0 mg/L             | 120 (65.2)      | 340 (57.7)      | 351 (65.0)      | 811 (61.8)  |

|                                     |               |            |            |            |             |
|-------------------------------------|---------------|------------|------------|------------|-------------|
|                                     | > 5.0 mg/L    | 64 (34.8)  | 249 (42.3) | 189 (35.0) | 502 (38.2)  |
|                                     | Missing       | 8          | 7          | 5          | 20          |
| <b>Lactate dehydrogenase</b>        | Normal        | 151 (83.4) | 489 (82.3) | 451 (83.2) | 1091 (82.8) |
|                                     | > ULN         | 30 (16.6)  | 105 (17.7) | 91 (16.8)  | 226 (17.2)  |
|                                     | Missing       | 11         | 2          | 3          | 16          |
| <b>International Staging System</b> | I/II          | 141 (78.3) | 433 (72.7) | 423 (77.6) | 997 (75.5)  |
|                                     | III           | 39 (21.7)  | 163 (27.4) | 122 (22.4) | 324 (24.5)  |
|                                     | Missing       | 12         | -          | -          | 12          |
| <b>Cytogenetics</b>                 | Standard risk | 126 (75.5) | 387 (73.3) | 322 (72.0) | 835 (73.1)  |
|                                     | High risk     | 41 (24.6)  | 141 (26.7) | 125 (28.0) | 307 (26.9)  |
|                                     | Missing       | 25         | 68         | 98         | 191         |
| <b>Anti-bacterial prophylaxis</b>   | No            | 21 (35.6)  | 67 (11.2)  | 9 (1.6)    | 97 (8.1)    |
|                                     | Yes           | 38 (64.4)  | 529 (88.8) | 536 (98.3) | 1103 (91.9) |
|                                     | Missing       | 133        | -          | -          | 133         |

GMMG German-speaking Myeloma Multicenter Group, *IT* induction therapy, *ULN* upper limit of normal, *WHO* World Health Organization.

**Table S3.** Study endpoints in the training cohort.

| <b>n (%)</b>                      | <b>GMMG-HD4</b> | <b>GMMG-MM5</b> | <b>GMMG-HD6</b> | <b>All</b> |
|-----------------------------------|-----------------|-----------------|-----------------|------------|
| Evaluable                         | 192 (100)       | 596 (100)       | 545 (100)       | 1333 (100) |
| Severe infection (grade $\geq$ 3) | 52 (27.1)       | 60 (10.1)       | 46 (8.4)        | 158 (11.8) |
| Death                             | 4 (2.1)         | 8 (1.3)         | 12 (2.2)        | 24 (1.8)   |
| Severe infection/death            | 53 (27.6)       | 64 (10.7)       | 50 (9.2)        | 167 (12.5) |
| Cause of death                    | (n = 4)         | (n = 8)         | (n = 12)        | (n = 24)   |
| Infection                         | 2 (50.0)        | 4 (50.0)        | 9 (75.0)        | 15 (62.5)  |
| Multiple myeloma                  | 1 (25.0)        | 2 (25.0)        | 2 (16.7)        | 5 (20.8)   |
| Thromboembolic event              | -               | 2 (25.0)        | 1 (8.3)         | 3 (12.5)   |
| Unknown                           | 1 (25.0)        | -               | -               | 1 (4.2)    |

GMMG German-speaking Myeloma Multicenter Group.

**Table S4.** Odds ratio and 95% confidence interval estimates comparing risk score stages for endpoints severe infection, death, and severe infection/death in the training cohort.

|                               | <b>Odds ratio</b> | <b>95% Confidence interval</b> | <b><i>p</i></b> |
|-------------------------------|-------------------|--------------------------------|-----------------|
| <b>Severe infection</b>       |                   |                                |                 |
| High vs low risk              | 3.40              | 1.99–5.79                      | < 0.001         |
| High vs intermediate risk     | 2.25              | 1.39–3.66                      | < 0.001         |
| Intermediate vs low risk      | 1.51              | 0.91–2.50                      | 0.06            |
| <b>Death</b>                  |                   |                                |                 |
| High vs low risk              | 15.67             | 2.68–91.56                     | < 0.001         |
| High vs intermediate risk     | 4.70              | 1.58–13.99                     | < 0.001         |
| Intermediate vs low risk      | 3.33              | 0.51–21.57                     | 0.13            |
| <b>Severe infection/death</b> |                   |                                |                 |
| High vs low risk              | 3.63              | 2.15–6.13                      | < 0.001         |
| High vs intermediate risk     | 2.34              | 1.46–3.76                      | < 0.001         |
| Intermediate vs low risk      | 1.55              | 0.94–2.55                      | 0.04            |

Comparison of risk groups for endpoints severe infection, death, or combined endpoint of severe infection/death.

**Table S5.** Distribution of baseline and risk factors in the validation cohorts.

| <i>n</i> (%)                        |          | <b>HOVON-65</b> | <b>EMN02/HOVON-95</b> | <b>GMMG-HD7</b> |
|-------------------------------------|----------|-----------------|-----------------------|-----------------|
| <b>Evaluable</b>                    | Yes      | 218 (100)       | 1491 (100)            | 658 (100)       |
| <b>Completed IT</b>                 | Yes      | 197 (90.3)      | 1340 (89.9)           | 605 (92.0)      |
| <b>Age &gt; 60 years</b>            | No       | 157 (72.0)      | 970 (65.1)            | 372 (56.5)      |
|                                     | Yes      | 61 (28.0)       | 521 (34.9)            | 286 (43.5)      |
|                                     | Missing  | -               | -                     | -               |
| <b>WHO performance status</b>       | 0–1      | 184 (84.8)      | 1270 (85.2)           | 592 (90.2)      |
|                                     | > 1      | 33 (15.2)       | 221 (14.8)            | 62 (9.8)        |
|                                     | Missing  | 1               | -                     | 2               |
| <b>Platelets</b>                    | ≥ 150/nL | 189 (87.1)      | 1263 (85.9)           | 592 (90.0)      |
|                                     | < 150/nL | 28 (12.9)       | 208 (14.1)            | 66 (10.0)       |
|                                     | Missing  | 1               | 20                    | -               |
| <b>International Staging System</b> | I/II     | 153 (78.9)      | 1163 (78.0)           | 516 (78.2)      |
|                                     | III      | 41 (21.1)       | 328 (22.0)            | 142 (21.6)      |
|                                     | Missing  | 24              | -                     | -               |
| <b>Anti-bacterial prophylaxis</b>   | No       | 27 (25.7)       | 361 (24.5)            | 16 (2.4)        |
|                                     | Yes      | 78 (74.3)       | 1112 (75.5)           | 642 (97.6)      |
|                                     | Missing  | 113             | 18                    | -               |

*EMN* European Myeloma Network, *GMMG* German-speaking Myeloma Multicenter Group, *HOVON* Dutch–Belgian Cooperative Trial Group for Hematology Oncology Foundation, *IT* induction therapy, *WHO* World Health Organization.



**Table S6.** Study endpoints in the validation cohorts.

| <i>n</i> (%)                                        | <b>HOVON-65</b> | <b>EMN02/HOVON-95</b> | <b>GMMG-HD7</b> |
|-----------------------------------------------------|-----------------|-----------------------|-----------------|
| <b>Evaluable</b>                                    | 218             | 1491                  | 658             |
| <b>Severe infection (grade <math>\geq</math> 3)</b> | 56 (25.7)       | 101 (6.8)             | 77 (11.7)       |
| <b>Death</b>                                        | 13 (6.0)        | 25 (1.7)              | 12 (1.8)        |
| <b>Severe infection/death</b>                       | 61 (28.0)       | 118 (7.9)             | 81 (12.3)       |

*EMN* European Myeloma Network, *GMMG* German-speaking Myeloma Multicenter Group, *HOVON* Dutch–Belgian Cooperative Trial Group for Hematology Oncology Foundation.

**Table S7.** Odds ratio and 95% confidence interval estimates comparing risk score stages for endpoints severe infection, death, and severe infection/death in the HO65 trial.

|                               | <b>Odds ratio</b> | <b>95% Confidence interval</b> | <b><i>p</i></b> |
|-------------------------------|-------------------|--------------------------------|-----------------|
| <b>Severe infection</b>       |                   |                                |                 |
| High vs low risk              | 3.12              | 1.15–8.45                      | 0.007           |
| High vs intermediate risk     | 2.23              | 0.80–6.20                      | 0.07            |
| Intermediate vs low risk      | 1.40              | 0.56–3.53                      | 0.39            |
| <b>Death</b>                  |                   |                                |                 |
| High vs low risk              | 6.67              | 0.89–49.86                     | 0.03            |
| High vs intermediate risk     | 1.49              | 0.33–6.70                      | 0.54            |
| Intermediate vs low risk      | 4.47              | 0.64–31.38                     | 0.07            |
| <b>Severe infection/death</b> |                   |                                |                 |
| High vs low risk              | 3.24              | 1.21–8.65                      | 0.005           |
| High vs intermediate risk     | 1.96              | 0.72–5.31                      | 0.11            |
| Intermediate vs low risk      | 1.65              | 0.68–4.02                      | 0.19            |

Comparison of risk groups for endpoints severe infection, death, or combined endpoint of severe infection/death.

**Table S8.** Odds ratio and 95% confidence interval estimates comparing risk score stages for endpoints severe infection, death, and severe infection/death in the EMN02/HO95 trial.

|                               | <b>Odds ratio</b> | <b>95% Confidence interval</b> | <b><i>p</i></b> |
|-------------------------------|-------------------|--------------------------------|-----------------|
| <b>Severe infection</b>       |                   |                                |                 |
| High vs low risk              | 2.36              | 1.25–4.46                      | 0.002           |
| High vs intermediate risk     | 1.48              | 0.83–2.66                      | 0.11            |
| Intermediate vs low risk      | 1.59              | 0.87–2.91                      | 0.07            |
| <b>Death</b>                  |                   |                                |                 |
| High vs low risk              | 5.11              | 1.05–24.97                     | 0.02            |
| High vs intermediate risk     | 1.17              | 0.40–3.43                      | 0.73            |
| Intermediate vs low risk      | 4.37              | 0.96–19.79                     | 0.02            |
| <b>Severe infection/death</b> |                   |                                |                 |
| High vs low risk              | 2.56              | 1.41–4.66                      | < 0.001         |
| High vs intermediate risk     | 1.50              | 0.87–2.59                      | 0.08            |
| Intermediate vs low risk      | 1.70              | 0.97–3.01                      | 0.03            |

Comparison of risk groups for endpoints severe infection, death, or combined endpoint of severe infection/death.

**Table S9.** Odds ratio and 95% confidence interval estimates comparing risk score stages for endpoints severe infection, death, and severe infection/death in the HD7 trial.

|                               | <b>Odds ratio</b> | <b>95% Confidence interval</b> | <b><i>p</i></b> |
|-------------------------------|-------------------|--------------------------------|-----------------|
| <b>Severe infection</b>       |                   |                                |                 |
| High vs low risk              | 3.38              | 1.62–7.04                      | < 0.001         |
| High vs intermediate risk     | 2.47              | 1.25–4.90                      | 0.002           |
| Intermediate vs low risk      | 1.37              | 0.66–2.82                      | 0.31            |
| <b>Death</b>                  |                   |                                |                 |
| High vs low risk              | 5.08              | 0.71–36.52                     | 0.05            |
| High vs intermediate risk     | 2.56              | 0.52–12.54                     | 0.17            |
| Intermediate vs low risk      | 1.98              | 0.26–15.19                     | 0.43            |
| <b>Severe infection/death</b> |                   |                                |                 |
| High vs low risk              | 3.68              | 1.78–7.62                      | < 0.001         |
| High vs intermediate risk     | 2.49              | 1.28–4.84                      | 0.001           |
| Intermediate vs low risk      | 1.48              | 0.73–3.02                      | 0.20            |

Comparison of risk groups for endpoints severe infection, death, or combined endpoint of severe infection/death.

## SUPPLEMENTARY FIGURE

**Fig. S1. Logistic regression analyses of factors influencing risk of severe infection, death, or combined endpoint of severe infection/death during induction therapy for each trial included in the training cohort.**

**A** Forest plots on factors associated with risk of severe infection. **B** Forest plots on factors influencing risk of death. **C** Forest plots on factors influencing risk of severe infection and/or death. Analyses are presented for each trial in the training cohort (HD4, MM5, and HD6) and overall. All logistic regression analyses including the complete training cohort accounted for trial effects. *P* values from univariable analysis were adjusted for multiple testing.

*BMI* body mass index, *CI* confidence interval, *ISS* International Staging System, *LDH* lactate dehydrogenase, *ULN* upper limit of normal, *WHO* World Health Organization.

**Fig. 1A**

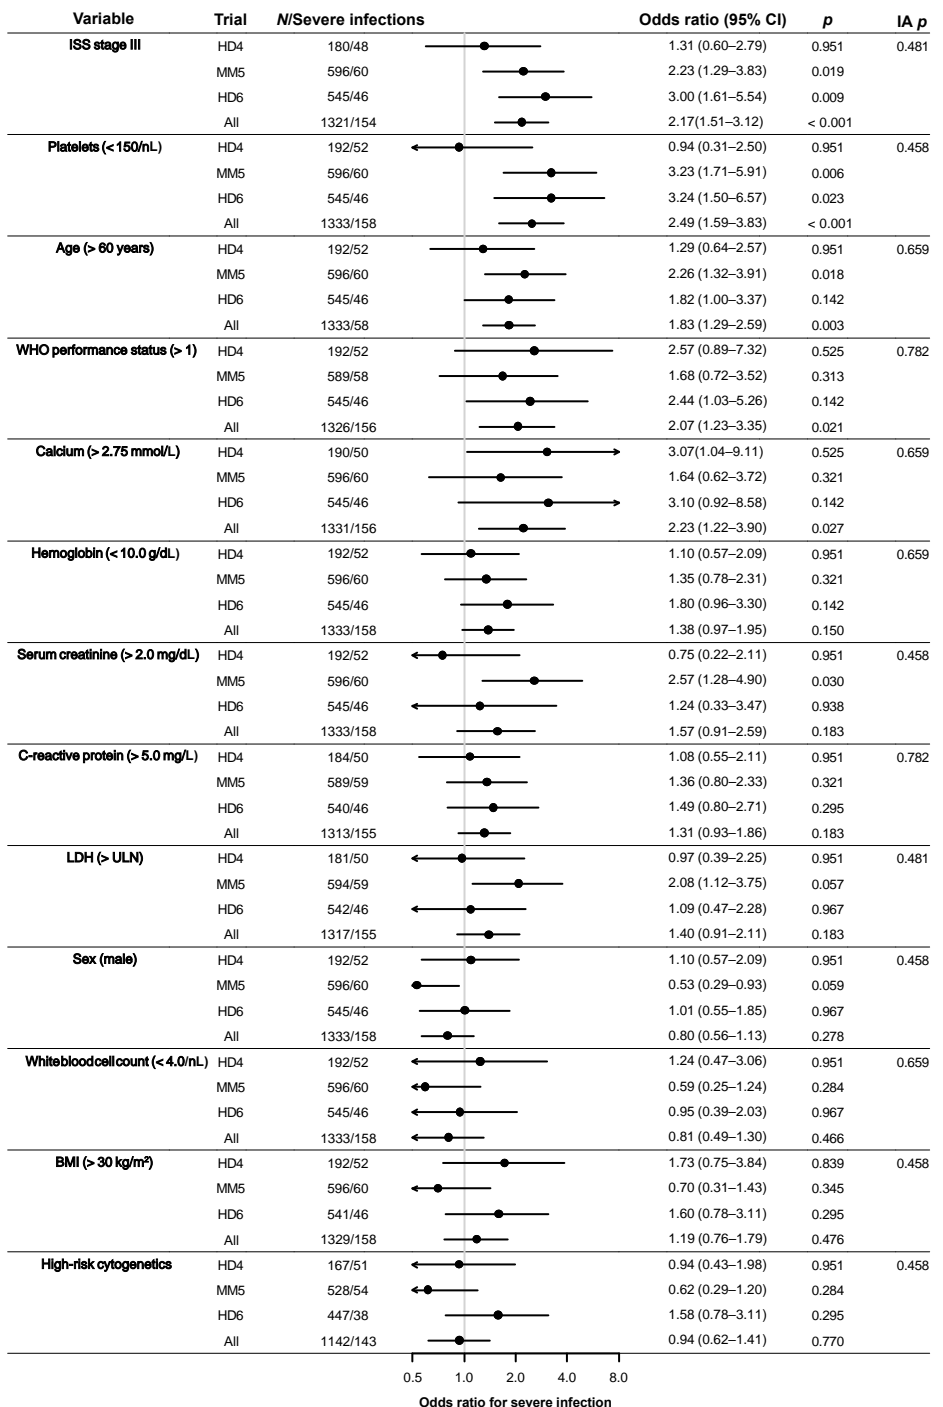

Fig. 1B

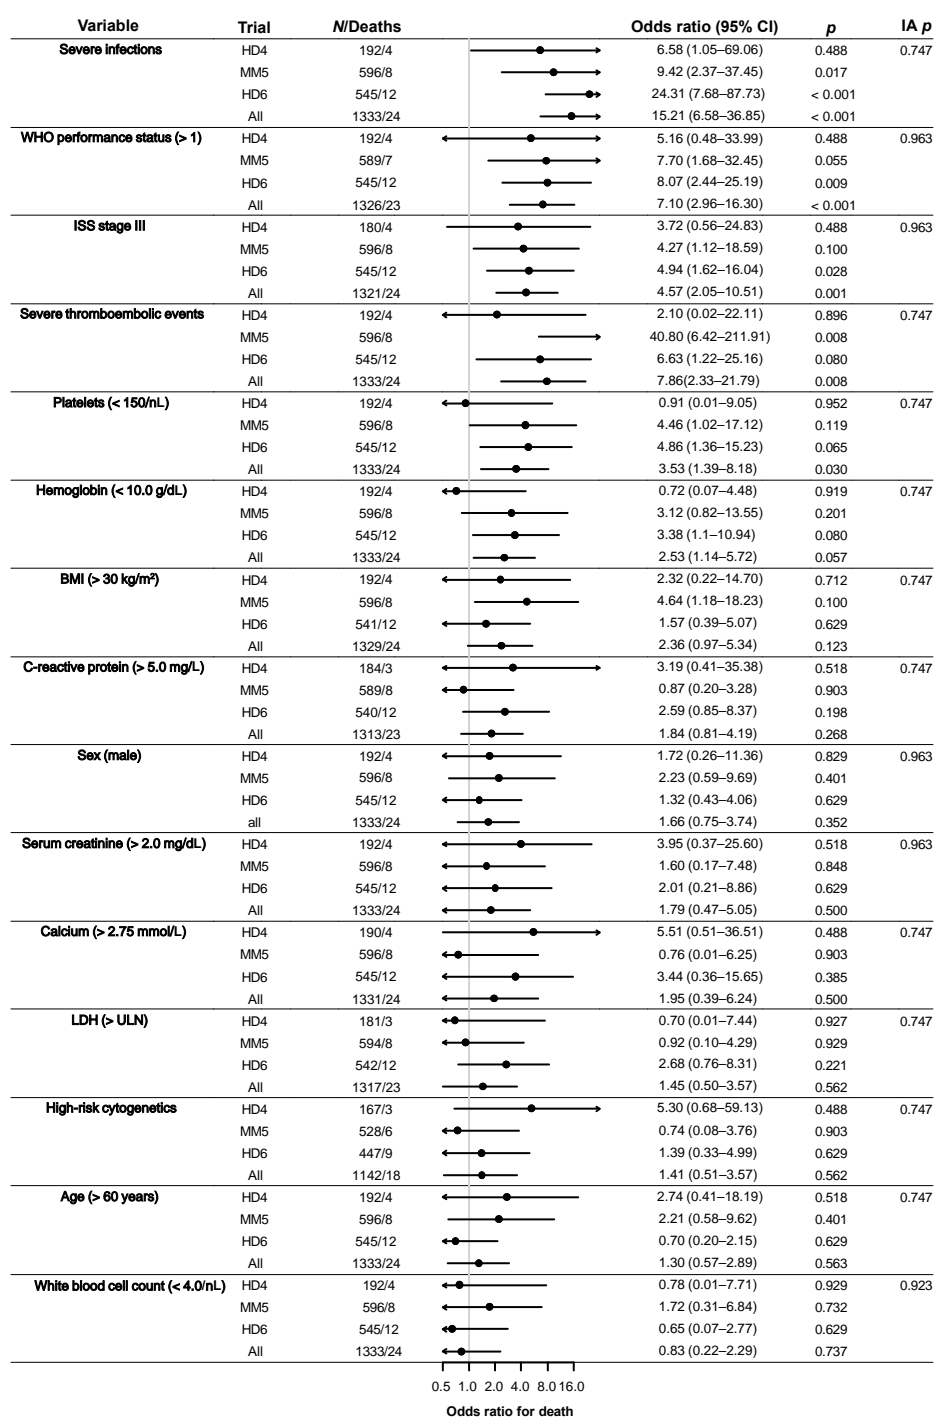

**Fig. 1C**

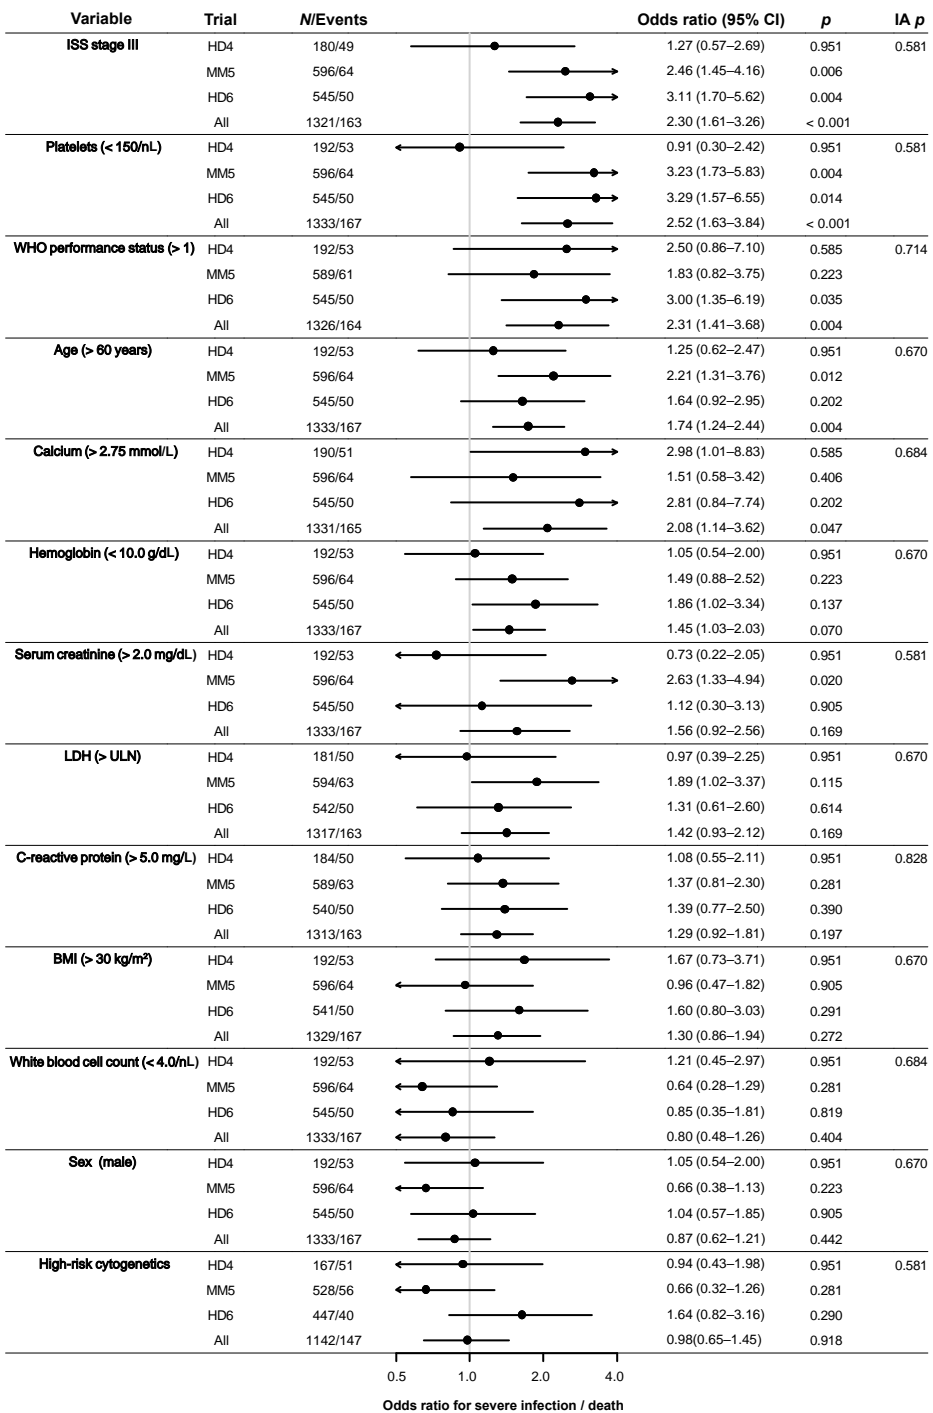

Supplement: MOESM1 [file 41375_2023_2105_MOESM1_ESM.pdf]
